# Supplementary material for: Superior breast cancer metastasis risk stratification using an epithelial-mesenchymal-amoeboid transition gene signature
Source: Springer Nature journal article supplement (doi:10.1186/s13058-020-01304-8), 2020-07-08
Supplement: MOESM1 [file 18159622]

## **Supplementary Material for “Superior breast cancer metastasis risk stratification using an Epithelial-mesenchymal-amoeboid transition gene signature”**

Amin Emad<sup>1,2,3</sup>, Tania Ray<sup>4</sup>, Tor W. Jensen<sup>5,7</sup>, Meera Parat<sup>3</sup>, Rachael Natrajan<sup>6</sup>, Saurabh Sinha<sup>2,3,7</sup>, Partha S. Ray<sup>4</sup>

<sup>1</sup> Department of Electrical and Computer Engineering, McGill University, Canada

<sup>2</sup> Carl R. Woese Institute for Genomic Biology, University of Illinois at Urbana-Champaign, USA

<sup>3</sup> Department of Computer Science, University of Illinois at Urbana-Champaign, USA

<sup>4</sup> Onconostic Technologies, Inc., Champaign, Illinois, USA

<sup>5</sup> Illinois Health Sciences Institute, University of Illinois at Urbana-Champaign, USA

<sup>6</sup> The Breast Cancer Now Toby Robins Research Centre, The Institute of Cancer Research, London, UK

<sup>7</sup> Cancer Center at Illinois, University of Illinois at Urbana-Champaign, USA

Corresponding Authors:

Partha S. Ray

Onconostic Technologies, Inc.

60 Hazelwood Drive, Suite 208

Champaign, IL, USA 61820

Phone: (+1) 908-625-5169

Email: partha.ray@onconostictechnologies.com

Saurabh Sinha

2122 Siebel Center

201 N. Goodwin Ave

Urbana, IL, USA 61801

Phone: (+1) 217-333-3233

Email: sinhas@illinois.edu

**Supplementary Figures:**

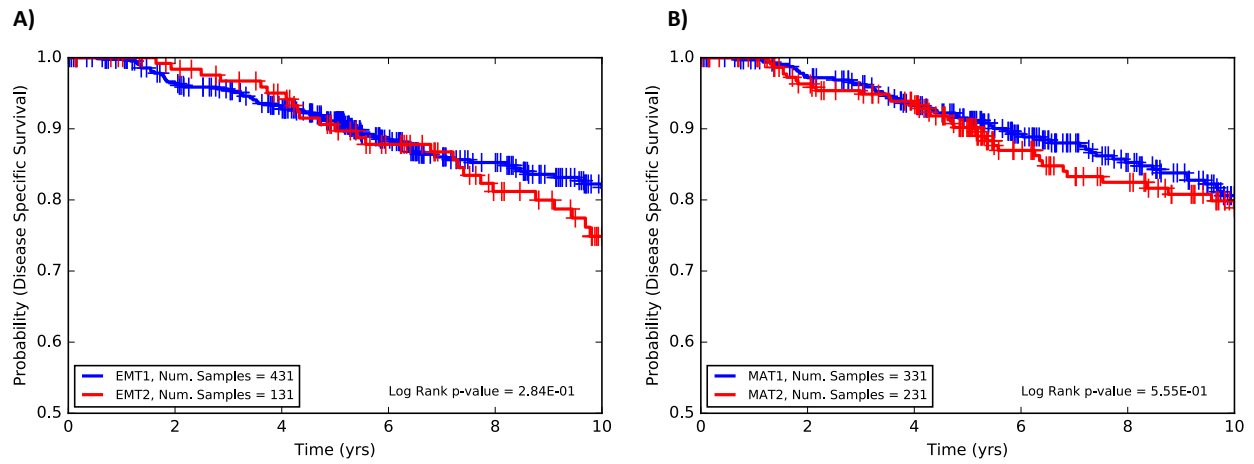

**Figure S1:** Kaplan-Meier survival analysis corresponding to clusters of LNN METABRIC samples based on EMT and MAT signatures. (A) Kaplan-Meier survival analysis for clusters obtained based on EMT gene signature using hierarchical clustering. (B) Kaplan-Meier survival analysis for clusters obtained based on MAT gene signature using hierarchical clustering.

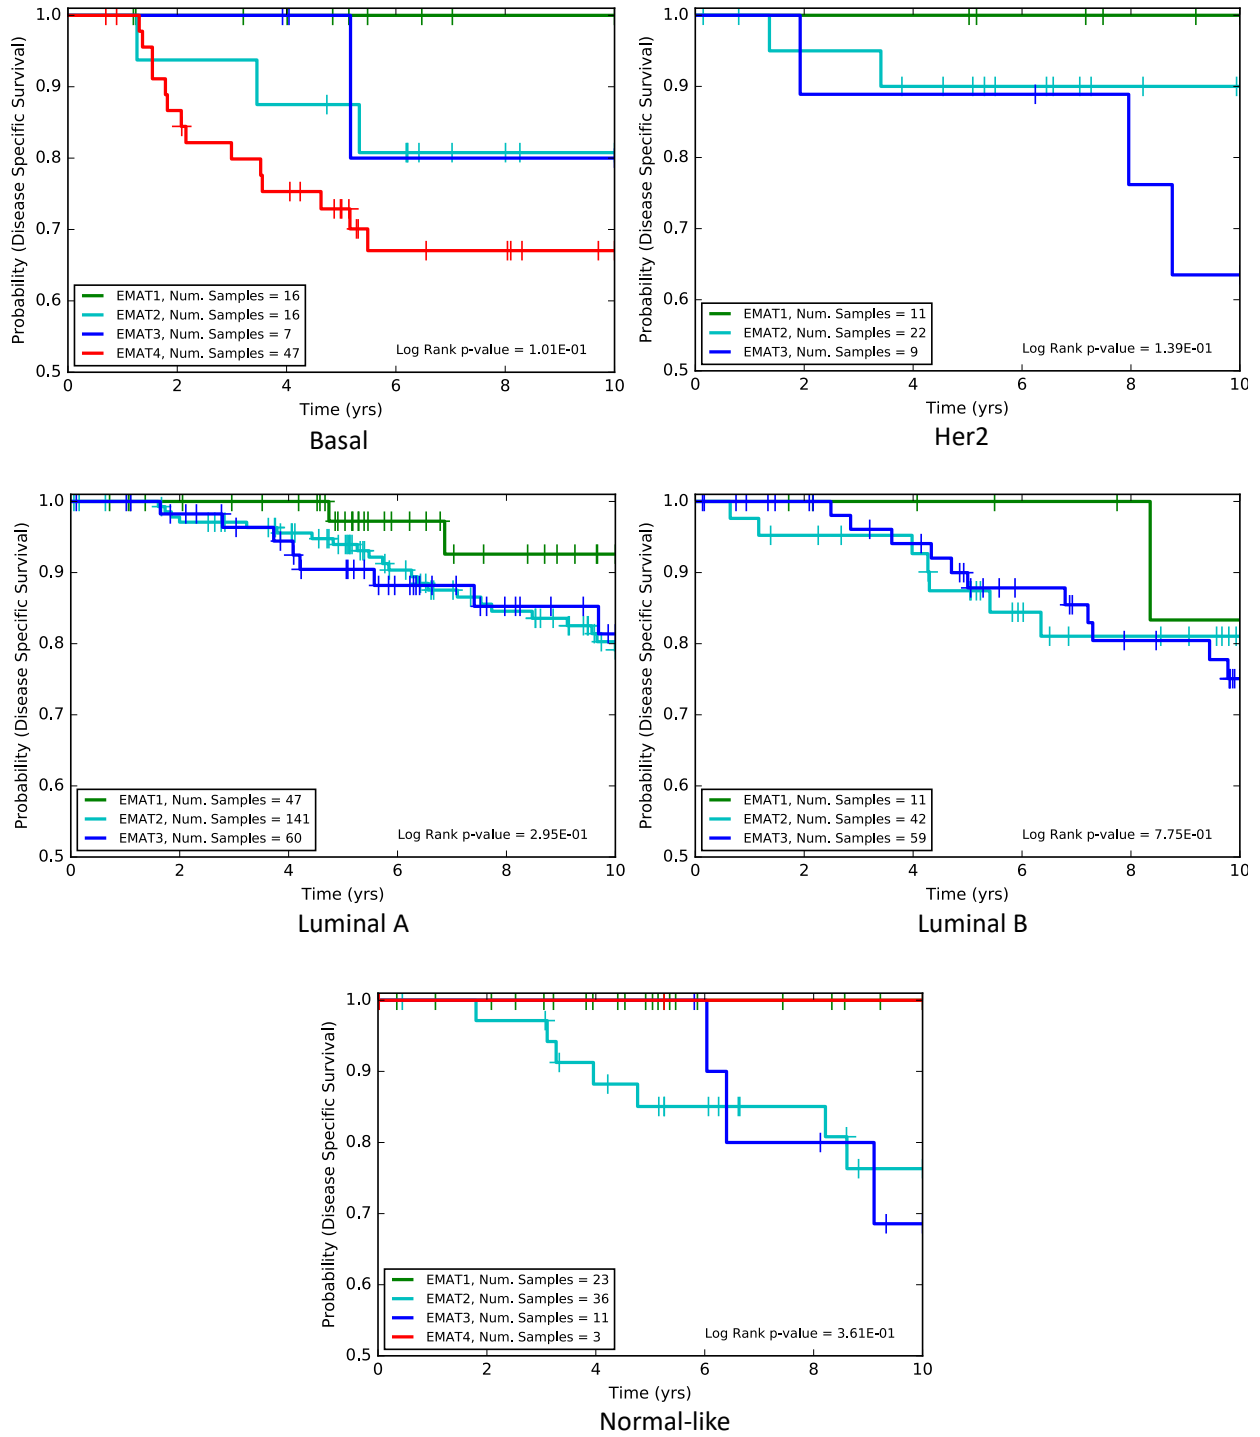

**Figure S2:** Kaplan-Meier survival analysis of EMAT clusters within each PAM50 subtypes of LNN METABRIC samples.

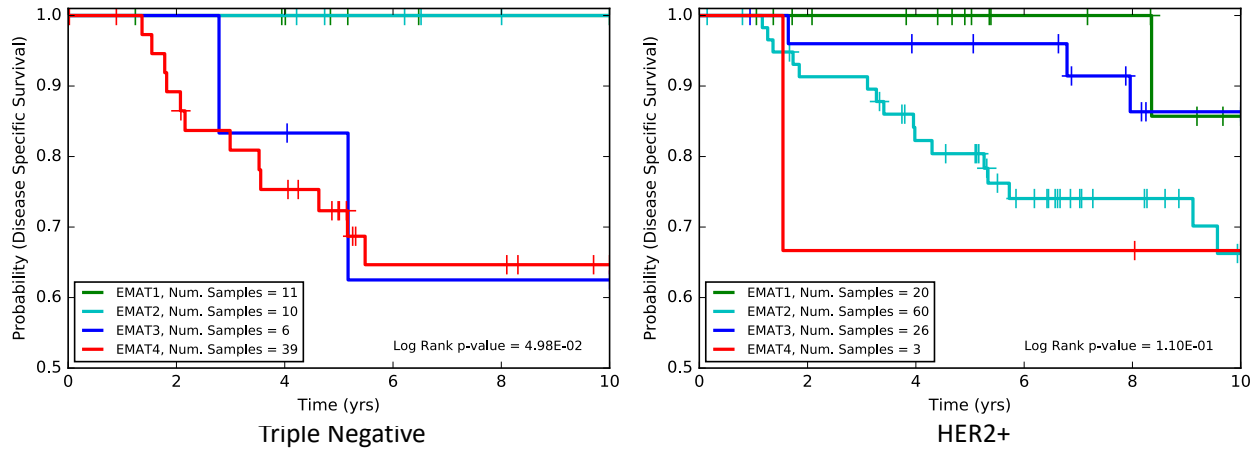

**Figure S3:** Kaplan-Meier survival analysis of EMAT clusters within HER2-positive and triple negative (TN) subtypes of LNN METABRIC samples.

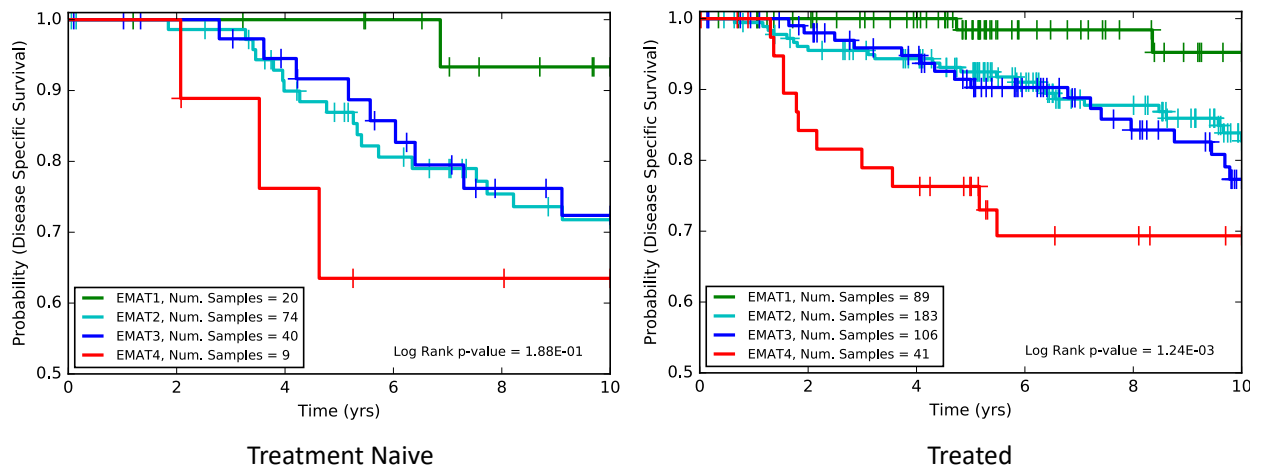

**Figure S4:** Kaplan-Meier survival analysis of EMAT clusters within treatment-naive and treated patients of LNN METABRIC samples.

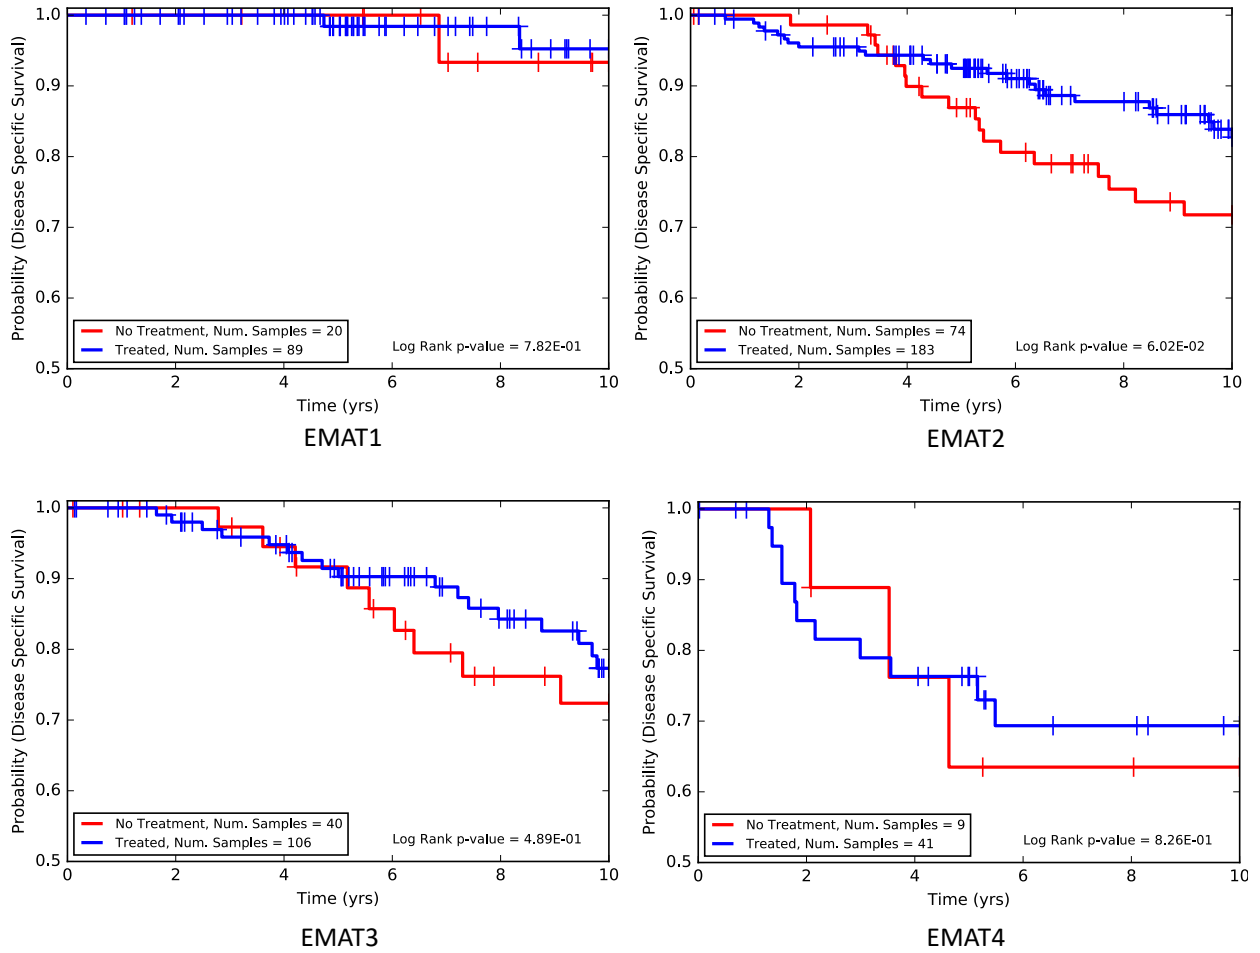

**Figure S5:** Kaplan-Meier survival analysis of treatment-naïve versus treated patients of LNN METABRIC samples within each EMAT cluster.

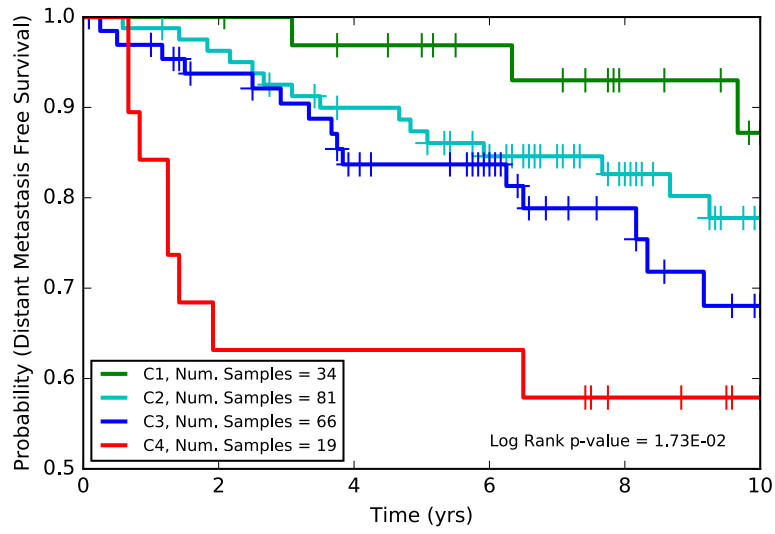

**Figure S6:** Cross-dataset analysis. The Kaplan-Meier survival plots correspond to EMAT subtypes of LNN breast cancer samples from the GSE11121 dataset. A 5-NN classifier trained on LNN METABRIC samples is used to assign EMAT subtype labels to each sample. In the figure, C1 = EMAT1, C2 = EMAT2, C3 = EMAT3 and C4 = EMAT4.

## Legends of Supplementary Tables:

**Table S1:** List of genes in the EMAT, EMT and MAT signatures. The table content is provided as a separate xlsx file.

**Table S2:** EMAT cluster labels of samples in the METABRIC and GSE11121 datasets. The table content is provided as a separate xlsx file. The labels are obtained using hierarchical clustering with 4 clusters, as described in the manuscript.

**Table S3:** Percent of EMT and MAT genes present among differentially expressed genes (DEGs) for each cluster and the ranked list of EMAT genes based on their differential expression p-values. The table content is provided as a separate xlsx file. DEGS for each EMAT cluster were defined as differentially expressed in that cluster compared to other clusters (Bonferroni adjusted  $p < 0.01$  using a two-sided t-test in the first tab).

**Table S4:** The association of EMAT genes with survival outcome. The p-values are obtained using a univariable Cox regression analysis.

**Table S5:** A summary of the characteristics of the EMAT clusters obtained using lymph node-negative breast cancer patients from the METABRIC study. In this table, P stands for positive and N for negative. EMAT1 has the least similarity to hESC and is enriched in normal-like PAM50 subtype of breast cancer and has a good prognosis. EMAT2, the cluster with a relatively good prognosis, has little similarity to hESC, is enriched in Luminal A subtype and in ER-positive and PR-positive samples. EMAT3, the cluster with a relatively moderate prognosis, has a high degree of similarity to hESC, is enriched in Luminal B subtype and in ER-positive, PR-positive and HER2-negative samples. EMAT4, the cluster with the worst prognosis, shows the highest degree of similarity to hESC, is enriched in the basal-like subtype of breast cancer as well as ER-negative, PR-negative and HER2-negative samples.

**Table S6:** Univariable and multivariable Cox regression analysis for GSE11121 samples. The table content is provided as a separate xlsx file.

**Table S7:** Differential expression analysis of TFs for each EMAT cluster. The table content is provided as a separate xlsx file. The p-values were obtained using a two-sided t-test and were corrected for multiple hypothesis testing.
